## Main Manuscript for

# Uncoupling differential water usage from drought resistance in a dwarf *Arabidopsis* mutant

Daniel N. Ginzburg: [dginzburg@carnegiescience.edu](mailto:dginzburg@carnegiescience.edu)

Flavia Bossi: [fbossi@carnegiescience.edu](mailto:fbossi@carnegiescience.edu)

Seung Y. Rhee: [srhee@carnegiescience.edu](mailto:srhee@carnegiescience.edu)\*

Department of Plant Biology, Carnegie Institution for Science, Stanford, United States

\*Corresponding author: Seung Y. Rhee

**Email:** [srhee@carnegiescience.edu](mailto:srhee@carnegiescience.edu)

**Author Contributions:** F.B., S.Y.R., and D.G. conceived the project. D.G. designed and performed the drought studies. F.B. generated the complemented lines. F.B. and S.Y.R. provided intellectual contribution to the studies and manuscript organization. D.G. wrote the manuscript and F.B. and S.Y.R. edited the manuscript.

**Competing Interest Statement:** Authors declare no conflict of interest.

**Classification:** Biological Sciences - Plant Biology

**Keywords:** drought resistance, *Arabidopsis thaliana*, dwarf, CHIQ1, Chiquita 1

**This file includes:**

Main Text  
Supplementary Information

## 1 Abstract

2 Understanding the molecular and physiological mechanisms of how plants respond to drought is  
3 paramount to breeding more drought resistant crops. Certain mutations or allelic variations result  
4 in plants with altered water-use requirements. To correctly identify genetic differences which  
5 confer a drought phenotype, plants with different genotypes must therefore be subjected to equal  
6 levels of drought stress. Many reports of advantageous mutations conferring drought resistance  
7 do not control for soil water content variations across genotypes and may therefore need to be re-  
8 examined. Here, we reassessed the drought phenotype of the *Arabidopsis thaliana* dwarf mutant,  
9 *chiquita1-1* (also called *cost1*), by growing mutant seedlings together with the wild type to ensure  
10 uniform soil water availability across genotypes. Our results demonstrate that the dwarf  
11 phenotype conferred by loss of *CHI1* function results in constitutively lower water usage, but not  
12 increased drought resistance.

## 13 Main Text

### 14 Introduction

15  
16  
17  
18 Among the various stresses plants endure in both natural and cultivated environments, drought  
19 stress has the greatest impact on plant productivity (1). From an agricultural context, drought can  
20 be defined as the state of insufficient water availability to sustain maximum plant growth (2). The  
21 impact of drought on global crop yields has intensified recently and is projected to intensify even  
22 more so in the future (3, 4). Identifying and engineering more drought resistant crops is therefore  
23 necessary to provide sufficient food to a growing population (5).

24 Plants employ various mechanisms in response to drought. The specific responses to  
25 drought are influenced by the degree of stress, plant species and genotype, and developmental  
26 stage (1). Some species respond by hastening the completion of their life cycle before the onset  
27 of more severe stress ('drought escape') (6). Other species respond by conserving or acquiring  
28 more water ('drought avoidance'), or by maintaining metabolic homeostasis to prevent or repair  
29 damaged cells and tissues ('drought tolerance') (6). The many terms used throughout the  
30 literature to describe plant responses to water deficit (e.g. drought resistance, drought tolerance,  
31 drought avoidance) are often used interchangeably, resulting in ambiguity and a deviation from  
32 established terminology (6, 7). This problem is compounded by results which could imply one or  
33 more forms of drought resistance (which encompasses escape, tolerance, and avoidance (6))  
34 depending on the available data. For example, in response to reduced soil water availability, a  
35 plant could respond by increasing root growth (a drought avoidance response; (8)) or via osmotic  
36 adjustment to maintain cell turgor (a drought tolerance response; (9)). Without establishing which  
37 of these mechanisms is involved, we cannot ascertain which specific drought resistance response  
38 is responsible for an observed phenotype.

39 Despite the well-reasoned need to evaluate drought responses of mutant lines at equal  
40 levels of desiccation stress as controls (6), there are many claims of increased drought resistance  
41 that do not include this essential comparison (for example 10–12). In all such cases, mutant  
42 seedlings which survived longer and/or had greater rates of recovery after drought were not  
43 grown in pots shared with control plants and thus were evaluated at potentially unequal levels of  
44 drought stress. This situation is particularly problematic for plants that may use water at different  
45 rates, such as dwarf plants.

46 Using a bioinformatic pipeline to identify novel transcriptional regulators, we previously  
47 identified (*CHIQUITA 1*) *CHI1*, a gene of unknown function involved in organ size control in  
48 *Arabidopsis thaliana* (*Arabidopsis*) (13). Bao and colleagues recently implicated *CHI1* (which  
49 they named as *COST1*) in drought tolerance when grown in pots separate from the wild type (11).  
50 Here, we reassessed the drought phenotype associated with loss of *CHI1* function when *chiquita1-1*  
51 seedlings were grown together with the wild type. Contrary to the previous report (11), we found  
52 that *chiquita1-1* plants do not exhibit increased resistance to drought, despite constitutive lower water  
53 usage, compared to the wild type.

## 54 Results

55

### 56 **CHIQ1 is not involved in drought resistance**

57 We evaluated *chiq1-1*'s water requirements and survival during drought to determine whether  
58 *CHIQ1* is involved in drought resistance or if *chiq1-1* plants simply use less water. When grown in  
59 pots with only a single genotype (either all wild type or all *chiq1-1*), *chiq1-1* plants survive longer  
60 during drought than wild type plants (Fig. 1A), consistent with the previous study (11). We next  
61 asked whether this phenotype was due to increased resistance to drought, or rather due to  
62 differences in the rate of water use between genotypes. We found that *chiq1-1* plants take up less  
63 water from the soil under both well-watered and drought conditions based on daily soil water  
64 content (SWC) levels (Fig. 1 B-C). Reintroducing wild type *CHIQ1* into the mutant background  
65 complemented the water-use and survival phenotypes observed in the *chiq1-1* null mutant (Fig.  
66 1A-C). When *chiq1-1* plants were grown in pots together with the wild type such that SWC was  
67 always equal for both genotypes, the visual onset of stress symptoms and duration of survival  
68 was uniform across genotypes (Fig. 2, Media Files 1-2). Additionally, photosystem II (PSII)  
69 quantum efficiency ( $F_v/F_m$ ), a commonly used metric to quantify plant stress (14), decreased  
70 uniformly in both genotypes, when planted together, as a result of withholding water (Fig. 1D).  
71 Together, these results indicate that *CHIQ1* is not involved in drought resistance, but rather that  
72 *chiq1-1* plants have constitutively lower water needs, resulting in a slower decrease in soil water  
73 availability and a delayed onset of stress symptoms when grown separately from the wild type.

74

## 75 Discussion

76

77 Plants with reduced size often survive longer in response to water deprivation (6). We previously  
78 showed that *chiq1-1* plants have smaller leaves than the wild type (13). In this study, we found  
79 that the reduction in plant size as a result of loss of *CHIQ1* function does not confer drought  
80 resistance. This is contrary to what was recently published (11), where wild type and *chiq1-1*  
81 plants were grown and droughted in different pots with the implicit assumption that SWC was  
82 equal in all pots after withholding water. This assumption can dramatically alter the conclusions  
83 drawn regarding drought resistance, as illustrated in this study. We showed that *chiq1-1* plants  
84 use less water than the wild type and therefore the SWC in pots containing only Col-0 or only  
85 *chiq1-1* was different as a function of time after withholding water. When we grew *chiq1-1* plants  
86 in the same pot as the wild type, such that both genotypes were always forced to cope with equal  
87 levels of SWC, *chiq1-1* plants were qualitatively and quantitatively no more resistant than the wild  
88 type to drought stress. This is not to say that *chiq1-1* is not potentially advantageous in an  
89 agronomic context (for example in a monoculture environment in which all plants are *chiq1-1*).  
90 Indeed, daily water usage in both well-watered and drought conditions demonstrates that the  
91 dwarf *chiq1-1* plants constitutively use less water than the wild type. However, when situated in  
92 an environment more competitive for water use, *chiq1-1* plants fare no better than their wild type  
93 neighbors. Our work highlights the importance of ensuring that comparisons between genotypes  
94 are made at equal levels of drought stress by subjecting both genotypes to uniform levels of  
95 stress.

96

## 97 Materials and Methods

98

99 **Plant materials and growth conditions** Pots were filled with an equal amount of PRO-MIX HP  
100 Mycorrhizae potting soil, (Premier Tech Horticulture, Quakertown, PA) by weight. After  
101 stratification in water at 4°C for 4 days before planting. All seedlings were grown in a growth  
102 chamber under a 16:8 hour light:dark cycle at 22°C, 40% RH, and  $\sim 100 \mu\text{mol m}^{-2} \text{s}^{-1}$   
103 photosynthetic photon flux density (PPFD) measured at pot-level.

104

105 **Single genotype per pot drought experiment** For water-use and survival experiments in which  
106 each genotype was planted separately, seeds were planted such that each pot contained 12  
107 seedlings of a single genotype (Col-0, *chiq1-1*, *proCHIQ1:CHIQ1-YFP* (in a *chiq1-1* background),

108 or *35Spro:CHI1-FLAG* (in a *chi1-1* background). At 28 days after sowing (DAS), pots were  
109 either subjected to drought (total withholding of water) or were maintained at 70% SWC as  
110 controls. All pots were weighed daily Monday-Friday to determine water loss in both control and  
111 drought conditions.

112  
113 **Multiple genotypes per pot drought experiment** For the experiments directly comparing  
114 drought resistance between Col-0 and *chi1-1* plants, one seedling each of Col-0 and *chi1-1*  
115 were planted in individual pots. At 28 DAS, pots were subjected to drought and were weighed  
116 daily Monday-Friday to determine SWC as a function of time.

117  
118 **Image capture and timelapse generation** Images were taken every 2 hours from directly above  
119 pots using a Raspberry Pi Zero W (Raspberry Pi Foundation, Cambridge UK) and an Arducam  
120 M12 lens (model B0031; <https://arducam.com>).

121  
122 **Chlorophyll fluorescence measurements** Chlorophyll fluorescence parameters were measured  
123 between 9:30-10:00am on the 7th true leaf of each sample using a chlorophyll fluorometer  
124 (OS30p+, Opti-Sciences, Inc. Hudson, New Hampshire).

## 125 126 **Acknowledgments**

127  
128 We thank the Arabidopsis Biological Resource Center (ABRC) for providing *chi1-1*  
129 (SALK\_064001) mutant seeds, A. Malkovskiy for helpful advice on imaging, Y. Dorone for helpful  
130 suggestions, and I. Villa and G. Materassi-Shultz for plant growth facility support. This work was  
131 done on the ancestral land of the Muwekma Ohlone Tribe, which was and continues to be of  
132 great importance to the Ohlone people.

## 133 134 **References**

- 135 1. H. Hu, L. Xiong, Genetic engineering and breeding of drought-resistant crops. *Annu. Rev.*  
136 *Plant Biol.* **65**, 715–741 (2014).
- 137 2. J. Deikman, M. Petracek, J. E. Heard, Drought tolerance through biotechnology: improving  
138 translation from the laboratory to farmers' fields. *Curr. Opin. Biotechnol.* **23**, 243–250 (2012).
- 139 3. G. Leng, J. Hall, Crop yield sensitivity of global major agricultural countries to droughts and the  
140 projected changes in the future. *Sci. Total Environ.* **654**, 811–821 (2019).
- 141 4. C. Lesk, P. Rowhani, N. Ramankutty, Influence of extreme weather disasters on global crop  
142 production. *Nature* **529**, 84–87 (2016).
- 143 5. H. C. J. Godfray, *et al.*, Food security: the challenge of feeding 9 billion people. *Science* **327**,  
144 812–818 (2010).
- 145 6. D. W. Lawlor, Genetic engineering to improve plant performance under drought: physiological  
146 evaluation of achievements, limitations, and possibilities. *J. Exp. Bot.* **64**, 83–108 (2013).
- 147 7. A. Blum, Genomics for drought resistance – getting down to earth. *Functional Plant Biology*  
148 **41**, 1191 (2014).
- 149 8. J. Levitt, Responses of plants to environmental stresses. Volume II. Water, radiation, salt, and  
150 other stresses (1980).
- 151 9. J. M. Morgan, Osmoregulation and Water Stress in Higher Plants. *Annu. Rev. Plant Physiol.*  
152 **35**, 299–319 (1984).
- 153 10. S.-W. Zhang, *et al.*, Altered architecture and enhanced drought tolerance in rice via the down-  
154 regulation of indole-3-acetic acid by TLD1/OsGH3.13 activation. *Plant Physiol.* **151**, 1889–  
155 1901 (2009).
- 156 11. Y. Bao, *et al.*, COST1 regulates autophagy to control plant drought tolerance. *Proc. Natl.*  
157 *Acad. Sci. U. S. A.* **117**, 7482–7493 (2020).
- 158 12. Y. Hong, *et al.*, Two Chloroplast Proteins Negatively Regulate Plant Drought Resistance  
159 Through Separate Pathways. *Plant Physiol.* **182**, 1007–1021 (2020).

- 160 13. F. Bossi, *et al.*, Systematic discovery of novel eukaryotic transcriptional regulators using  
161 sequence homology independent prediction. *BMC Genomics* **18**, 480 (2017).  
162 14. N. R. Baker, Chlorophyll fluorescence: a probe of photosynthesis in vivo. *Annu. Rev. Plant*  
163 *Biol.* **59**, 89–113 (2008).  
164 15. F. Bossi, *et al.*, *CHIQUITA1* maintains temporal transition between proliferation and  
165 differentiation in *Arabidopsis thaliana*. bioRxiv (2021). MS ID#: BIORXIV/2021/469926

166 **Figures**

167

168 **Figure 1.**

169 ***chiq1-1* plants use less water than the wild type, but do not display increased drought**  
170 **resistance when grown together.** A) Representative images of Col-0, *chiq1-1*, and the  
171 complemented line *CHIQ1pro:CHIQ1-YFP* grown in separate pots in control and drought  
172 conditions (12 days since last watering). B) Average daily water loss by genotype in well-watered  
173 (control) conditions (n = 31-46; N = 4). Black asterisk indicates statistical significance (p-value <  
174 0.05) using Dunnett's test with Col-0 as control. C) Percent soil water content by genotype during  
175 drought. Light-colored bands represent 95% confidence intervals of (n = 4-6; N = 2-3).  
176 Representative Col-0 and *chiq1-1* images are shown at 0, 12, and 17 days since the last  
177 watering. D) Photosystem II quantum efficiency ( $F_v/F_m$ ) as a function of drought of Col-0 and  
178 *chiq1-1* when grown in shared pots (n = 14-46; N = 2-3). Soil water content % at each time-point  
179 is overlaid in the black dashed line (n = 48; N = 3). Letters represent significantly different groups  
180 (p-value  $\leq 0.05$ ) as determined by two-way analysis of variance followed by Tukey's HSD test.  
181 n = number of samples per genotype per condition per experiment. N = number of independent  
182 experiments.

183

184 **Figure 2.**

185 ***chiq1-1* plants display visual symptoms of drought stress at the same time as the wild type**  
186 **when grown together.** Representative images of pots containing one Col-0 and *chiq1-1* seedling  
187 over the course of drought. Day numbers represent days since last watering. Arrows point  
188 towards the *chiq1-1* seedling.

189 **Supplementary Information**

190

191 **Media Files 1 and 2.**

192 ***chiq1-1* plants display equal drought resistance to the wild type when grown in shared**  
193 **pots.** Timelapse videos of pots containing one Col-0 and *chiq1-1* seedling. Orange (File 1) and  
194 blue (File 2) arrows point towards the *chiq1-1* seedling. Video begins on the last day of watering  
195 (28 DAS) and end 20 days later.

196

197 **Extended Methods:**

198

199 **Plant materials and growth conditions** Wild type *Arabidopsis thaliana* accession Columbia-0  
200 (Col-0) and *chiq1-1* mutant (SALK\_064001) seeds were obtained from the Arabidopsis Biological  
201 Resource Center (ABRC). *CHIQ1* complementation lines were obtained as described in (15).  
202 Water content of fresh PRO-MIX HP Mycorrhizae potting soil was determined by drying 3  
203 samples of fresh soil at 45°C for 1 week. Average water content of fresh soil was calculated as  
204 dry weight/fresh weight. To determine soil water holding capacity (100% SWC), 8 pots were filled  
205 with fresh soil, weighed, saturated with water, covered, and then left to drip until pots reached pot  
206 capacity (cessation of dripping). They were then weighed again to determine the average water-  
207 holding capacity of the soil.

208

209 To obtain 12 seedlings per pot for the single-genotype per pot experiments, 3-4 seeds were  
210 planted in each of 12 locations within a pot. After seeding, pots were put into flats and were  
211 covered for 1 week, after which covers were removed and each pot was thinned to contain 12  
212 seedlings. Flats were rotated daily Monday-Friday to avoid positional effects. Statistical  
213 differences in weekday water usage per day across genotypes was determined by one-way  
214 analysis of variance (ANOVA) followed by Dunnett's test ( $P < 0.05$ ) setting Col-0 as control and  
215 using the `DunnettTest()` function within the `DescTools` package in R version 3.6.3.

216

217 **Image capture and timelapse generation** Images were captured using the `camera.capture()`  
218 Python function and were taken at 2-hour intervals using the command-line job scheduler,  
219 `crontab` (Unix). To remove lens distortion, images were corrected in Adobe Photoshop CS6  
220 (Adobe Systems, Inc., San Jose, CA, USA) using the "Lens correction" feature. All images were  
221 then stitched together into a time series video using `Davinci Resolve 17` (Blackmagic Design, Port  
222 Melbourne, Victoria, Australia).

223

224 **Chlorophyll fluorescence measurements** After dark-adapting leaves for 30 minutes, a weak  
225 modulated light ( $0.1 \mu\text{mol m}^{-2} \text{s}^{-1}$  PPFD) was applied to measure minimum fluorescence ( $F_0$ ).  
226 Maximum fluorescence ( $F_M$ ) was measured after applying a saturating light pulse ( $6000 \mu\text{mol m}^{-2}$   
227  $\text{s}^{-1}$  PPFD) of 1 second to the sampled region. Photosystem II quantum efficiency ( $F_V/F_M$ ) was  
228 calculated as  $(F_M - F_0)/F_M$ . Statistical differences in  $F_V/F_M$  values between genotypes as a function  
229 of time were determined by two-way ANOVA followed by Tukey's honestly significant difference  
230 test ( $P < 0.05$ ) using the `lsmeans()` function within the `lsmeans` package in R version 3.6.3.

231

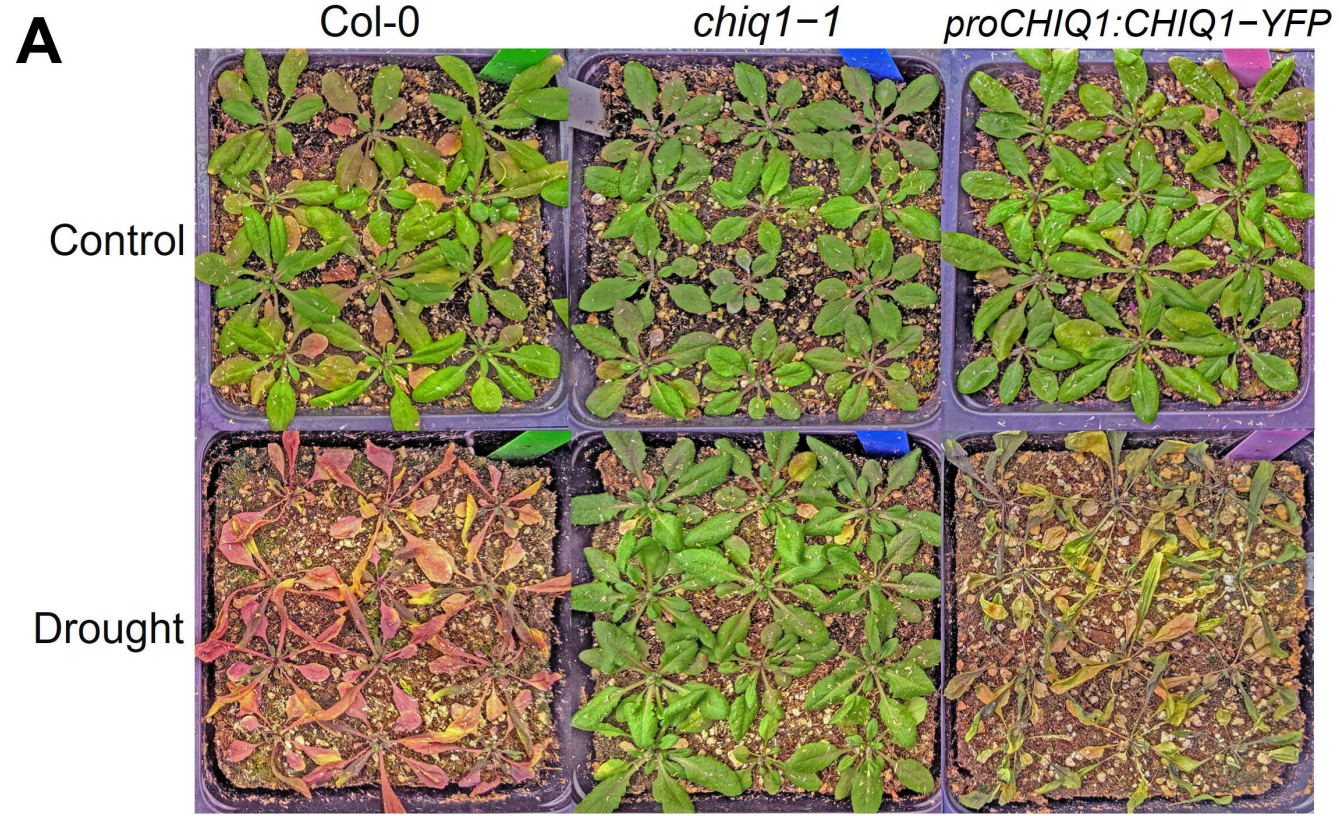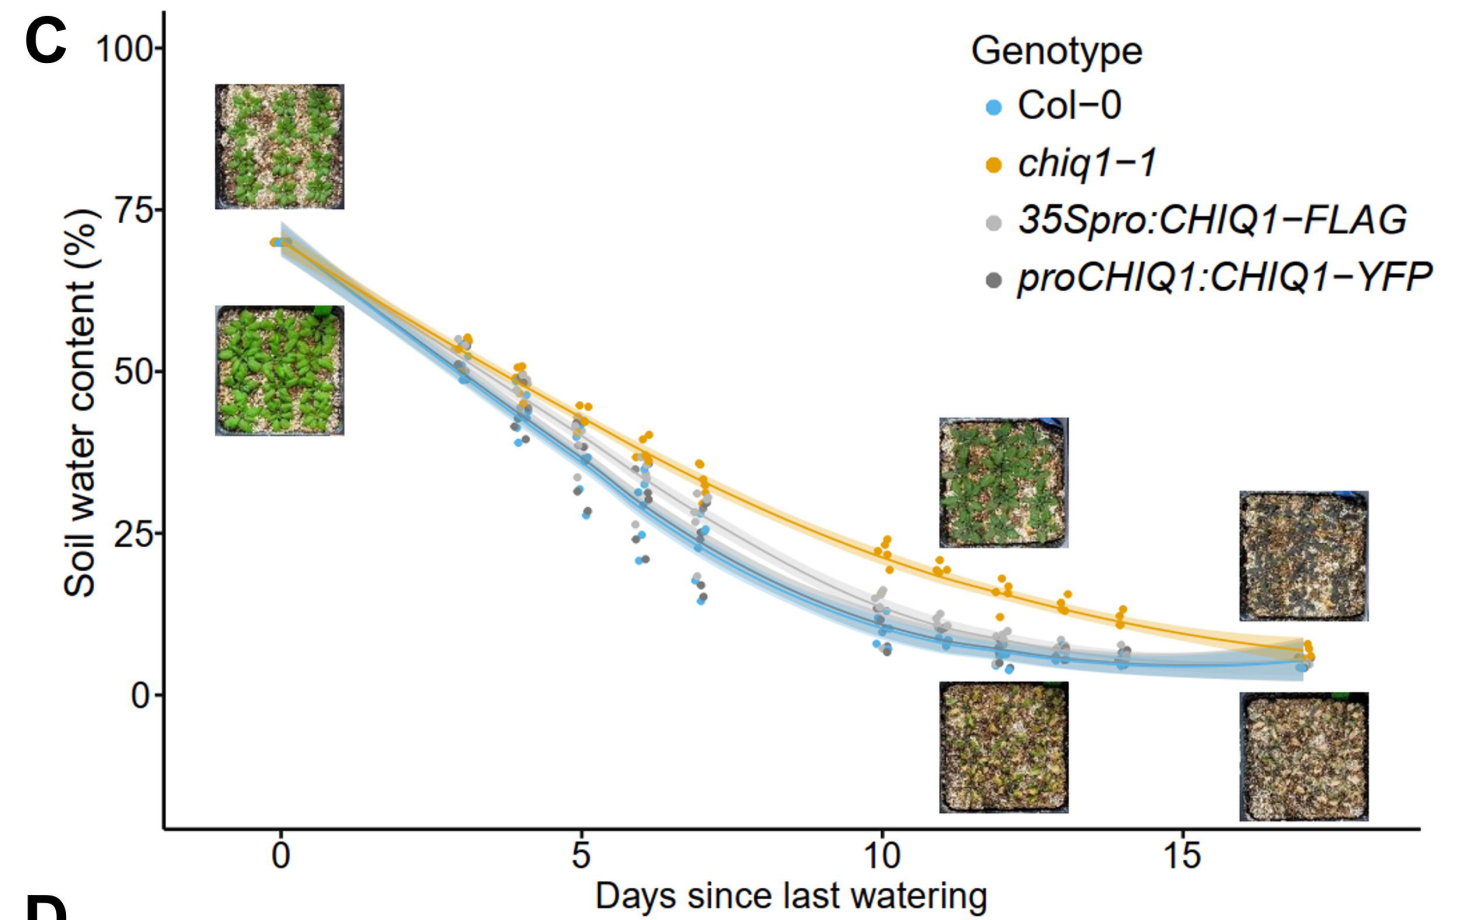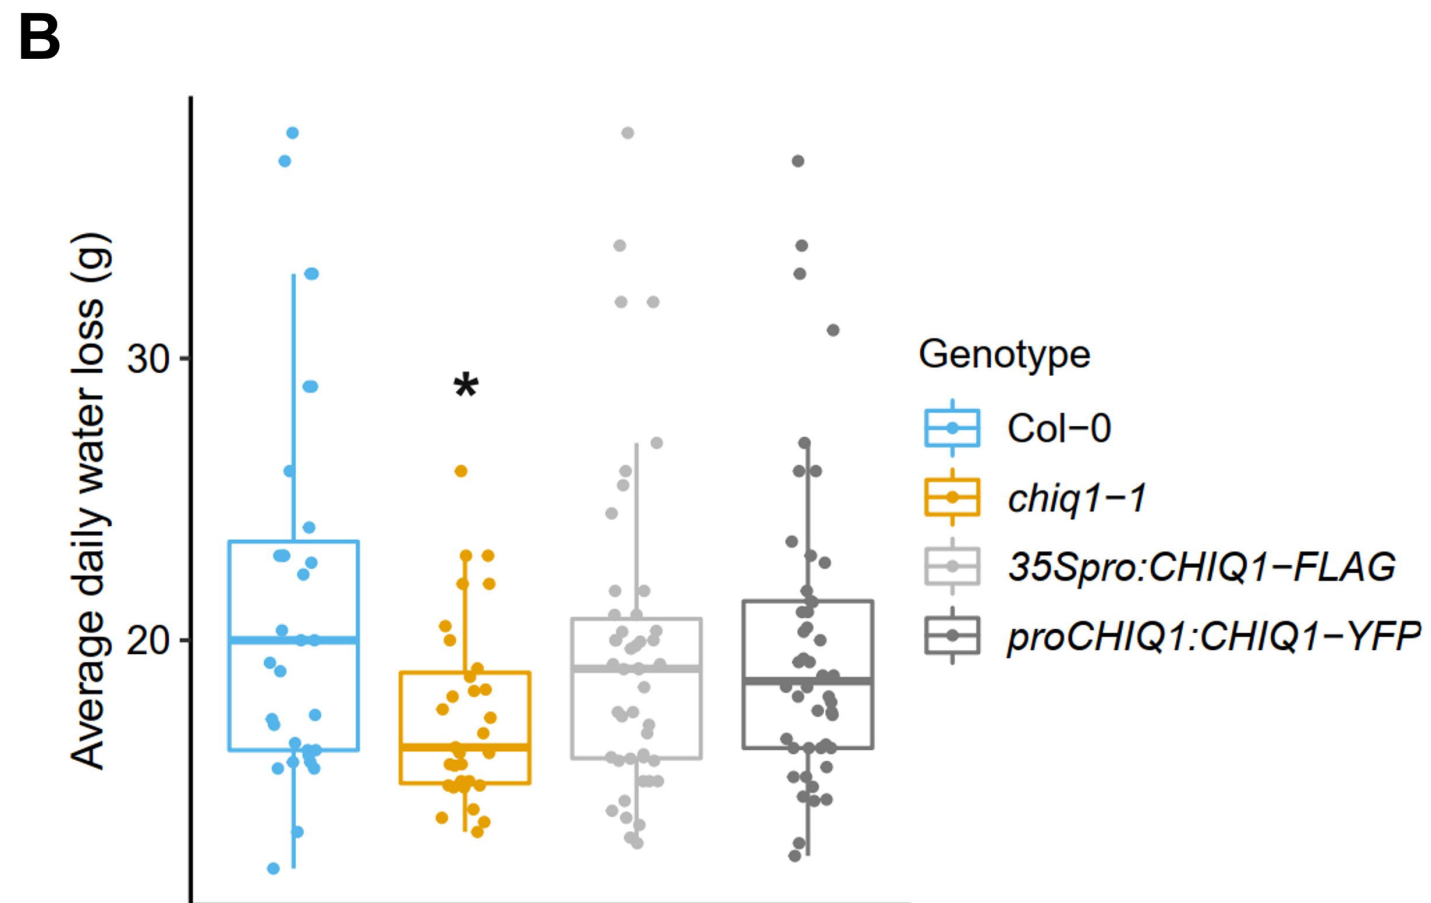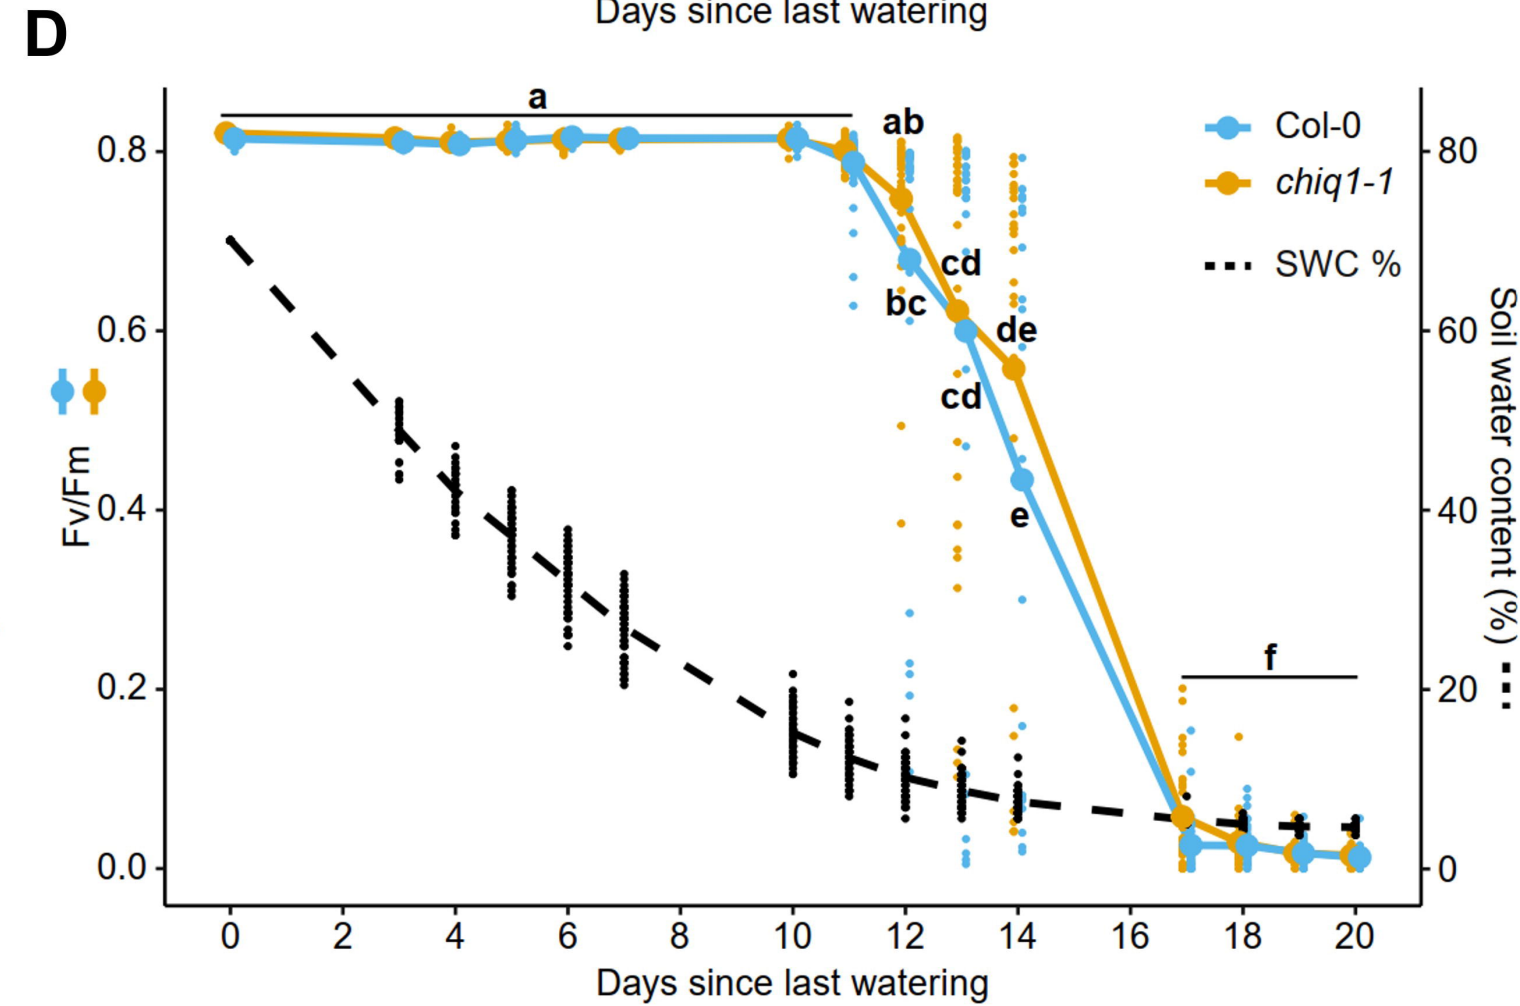



Day 0

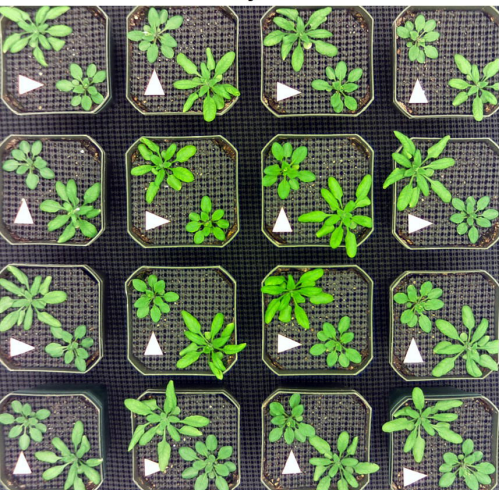

Day 4

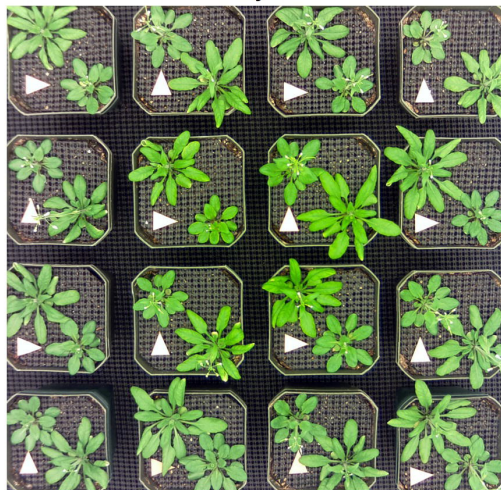

Day 8

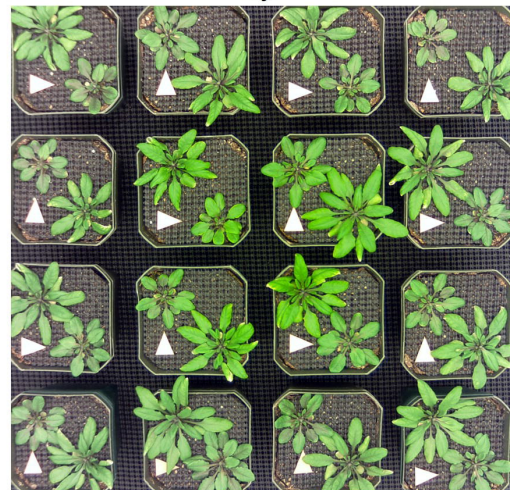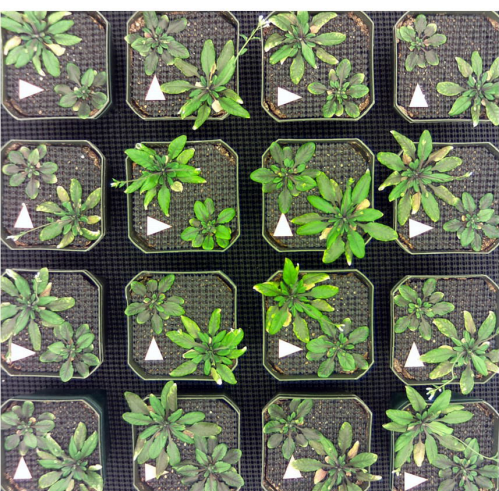

Day 12

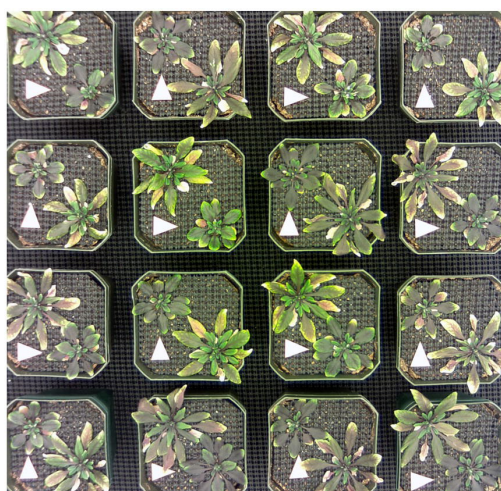

Day 16

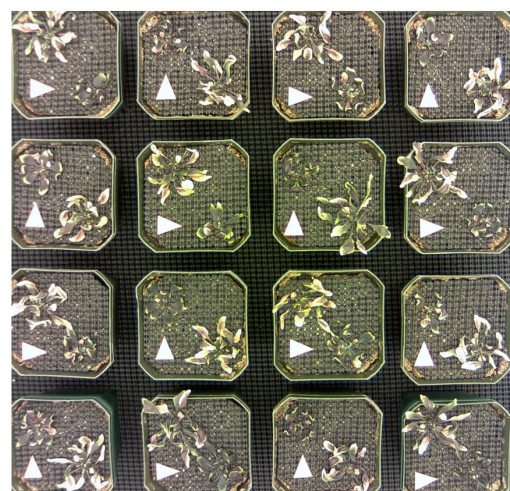

Day 20
